# Supplementary material for: Mixed Grazing Systems Benefit both Upland Biodiversity and Livestock Production
Source: PLoS One. 2014 Feb 13;9(2):e89054. doi: 10.1371/journal.pone.0089054 (PMC3923862; doi:10.1371/journal.pone.0089054)
Supplement: Table S2 — Summary of butterfly species recorded on experimental plots within different upland grazing systems 2005–2008. (XLSX) [file pone.0089054.s002.xlsx]

## Sheet: Butterflies
Table S2: Summary of butterfly species recorded on experimental plots within different upland grazing systems 2005 - 2008. Values are based on surveys conducted between May - September each year.
		Grazing System
		S PP					S/C6L PP					S/C6L SN					S/C12L SN					S/C6BG SN
		2005	2006	2007	2008		2005	2006	2007	2008		2005	2006	2007	2008		2005	2006	2007	2008		2005	2006	2007	2008
Clouded Yellow	Colias croceus	0	0	0	0		0	0	0	0		0	0	0	0		4	0	0	0		0	0	0	0
Comma	Polygonia c-album	0	0	0	0		0	0	0	0		0	1	0	0		0	0	0	0		0	1	0	0
Green Hairstreak	Callophrys rubi	0	0	0	0		0	0	0	0		0	0	1	0		0	0	3	0		0	0	0	0
Green-veined White	Pieris napi	4	8	1	3		6	7	9	4		39	108	121	113		37	78	148	61		112	107	114	65
Large Skipper	Ochlodes sylvanus	0	0	0	0		0	0	0	0		27	51	12	1		16	46	17	1		33	73	24	3
Large White	Pieris brassicae	2	0	0	0		2	0	0	0		8	0	6	0		8	0	5	0		13	0	0	2
Meadow Prown	Maniola jurtina	0	4	0	0		2	1	0	0		78	160	106	18		31	154	145	22		37	97	67	18
Orange-tip	Anthocharis cardamines	0	0	0	0		0	0	4	2		5	31	35	27		7	20	13	10		13	20	30	7
Painted Lady	Vanessa cardui	0	0	0	0		0	0	0	0		0	1	1	0		0	1	0	0		0	10	1	0
Peacock	Aglais io	2	0	0	0		0	1	0	0		4	3	3	0		1	3	3	0		2	4	6	0
Red Admiral	Vanessa atalanta	0	0	0	0		0	1	1	0		1	3	2	0		3	4	6	0		1	4	2	0
Ringlet	Aphantopus hyperantus	0	1	0	0		0	5	0	0		105	126	97	36		86	83	132	42		194	139	90	18
Small Copper	Lycaena phlaeas	0	0	0	0		0	0	0	0		3	0	1	0		1	0	1	0		1	0	0	0
Small Heath	Coenonympha pamphilus	0	0	0	0		0	0	0	0		35	23	25	22		27	25	17	8		37	33	27	6
Small Pearl-bordered Fritillary	Boloria selene	0	0	0	0		0	0	0	0		46	31	48	10		22	23	36	20		43	51	30	8
Small Skipper	Thymelicus sylvestris	0	0	0	0		0	0	0	0		12	0	5	1		3	0	19	0		12	0	15	0
Small Tortoiseshell	Aglais urticae	1	1	0	1		0	0	1	0		1	4	6	2		3	7	5	0		3	1	7	1
Small White	Pieris rapae	3	1	0	0		5	1	0	0		25	5	0	0		39	20	0	0		102	17	3	1
Speckled Wood	Pararge aegeria	0	0	0	0		0	0	0	0		1	1	0	2		0	0	1	0		0	0	0	1
	Species richness	5	2	1	2		4	5	4	2		15	14	15	11		15	14	15	7		14	13	13	11
S PP = sheep only grazing permanent pasture; S/C6L PP = sheep and Limousin cross cattle grazing permanent pasture at a ratio of 6:1; S/C6L SN = sheep and Limousin cross cattle grazing permanent pasture at a ratio of 6:1 with cattle removed to semi-natural vegetation for 10 weeks; S/C12L SN = sheep and Limousin cross cattle grazing permanent pasture at a ratio of 12:1 with cattle removed to semi-n…
